# Supplementary material
Source: publisher figshare collection journal article supplement (https://tandf.figshare.com/ndownloader/files/17786513)
Supplement: Supplementary file 1 [file 17786513]

## Sheet: Appendix 1
Appendix, Table 1. ICD-9 Codes for Comorbidities
Condition	ICD-9 Codes
Chronic kidney disease	274.10
	274.11
	274.19
	403.00
	403.01
	403.10
	403.11
	403.90
	403.91
	404.00
	404.01
	404.02
	404.03
	404.10
	404.11
	404.12
	404.13
	404.90
	404.91
	404.92
	404.93
	582.0x
	582.1x
	582.2x
	582.4x
	582.81
	582.89
	582.9x
	585.1x
	585.2x
	585.3x
	585.4x
	585.5x
	585.6x
	585.9x
	590.00
	590.01
	753.0x
	753.10
	753.11
	753.12
	753.13
	753.14
	753.15
	753.16
	753.17
	753.19
	753.3x
Chronic obstructive pulmonary disease	490.xx-496.xx
	500.xx
	501.xx
	502.xx
	503.xx
	504.xx
	505.xx
	506.4x
Pneumonia	480.0x
	480.1x
	480.2x
	480.3x
	480.8x
	480.9x
	481.xx
	482.0x
	482.1x
	482.2x
	482.30
	482.31
	482.32
	482.39
	482.40
	482.41
	482.42
	482.49
	482.81
	482.82
	482.83
	482.84
	482.89
	482.9x
	483.0x
	483.1x
	483.8x
	484.1x
	484.3x
	484.5x
	484.6x
	484.7x
	484.8x
	485.xx
	486.xx
	487.0x
	488.01
	488.11
	488.81
	997.31
	997.32
Cirrhosis	571.0x
	571.2x
	571.5x
	571.8x
Hepatitis	070.xx
	570.xx
	571.1x
	571.40
	571.41
	571.42
	571.49
	573.1x
	573.2x
	573.3x
	V02.60
	V02.61
	V02.62
	V02.69
Coronary artery disease	411.0x
	411.1x
	411.81
	411.89
	412.xx
	413.0x
	413.1x
	413.9x
	414.00
	414.01
	414.02
	414.03
	414.04
	414.05
	414.06
	414.07
	414.10
	414.11
	414.12
	414.19
	414.2x
	414.3x
	414.4
	414.8x
	414.9x
	429.2x
Diabetes mellitus	250.xx
Gastrointestinal bleed	455.2x
	455.5x
	455.8x
	456.0x
	456.20
	530.7x
	530.21
	530.82
	531.00
	531.01
	531.20
	531.21
	531.40
	531.41
	531.60
	531.61
	532.00
	532.01
	532.20
	532.21
	532.40
	532.41
	532.60
	532.61
	533.00
	533.01
	533.20
	533.21
	533.40
	533.41
	533.60
	533.61
	534.00
	534.01
	534.20
	534.21
	534.40
	534.41
	534.60
	534.61
	535.01
	535.11
	535.21
	535.31
	535.41
	535.51
	535.61
	535.71
	537.83
	537.84
	562.02
	562.03
	562.12
	562.13
	569.3x
	569.83
	569.85
	569.86
	578.0x
	578.1x
	578.9x
	784.8x
	772.4x
Heart failure	402.x1
	404.x1
	404.x3
	428.xx
Ischemic stroke	433.01
	433.11
	433.21
	433.31
	433.81
	433.91
	434.01
	434.11
	434.91
Transient ischemic attack	435.xx
Intracranial bleed	430.XX
	431.xx
	432.0x
	432.1x
	432.9x
	852.00
	852.01
	852.02
	852.03
	852.04
	852.05
	852.06
	852.09
	852.20
	852.21
	852.22
	852.23
	852.24
	852.25
	852.26
	852.29
	852.40
	852.41
	852.42
	852.43
	852.44
	852.45
	852.46
	852.49
	853.00
	853.01
	853.02
	853.03
	853.04
	853.05
	853.06
	853.09
	853.10
	853.11
	853.12
	853.13
	853.14
	853.15
	853.16
	853.19
Myocardial infarction	410.00
	410.01
	410.02
	410.10
	410.11
	410.12
	410.20
	410.21
	410.22
	410.30
	410.31
	410.32
	410.40
	410.41
	410.42
	410.50
	410.51
	410.52
	410.60
	410.61
	410.62
	410.70
	410.71
	410.72
	410.80
	410.81
	410.82
	410.90
	410.91
	410.92
	412.xx
Paraplegia	343.0x
	344.1x
Hemiplegia	342.00
	342.01
	342.02
	342.10
	342.11
	342.12
	342.80
	342.81
	342.82
	342.90
	342.91
	342.92
	343.1x
	343.4x
	438.20
	438.21
	438.22
	438.30
	438.31
	438.32
	438.40
	438.41
	438.42
	438.50
	438.51
	438.52
	438.53
Psychiatric disorders	290.0x
	290.10
	290.11
	290.12
	290.13
	290.20
	290.21
	290.3x
	290.40
	290.41
	290.42
	290.43
	290.8x
	290.9x
	291.0x
	291.1x
	291.2x
	291.3x
	291.4x
	291.5x
	291.81
	291.82
	291.89
	291.9x
	292.0x
	292.11
	292.12
	292.2x
	292.81
	292.82
	292.83
	292.84
	292.85
	292.89
	292.9x
	293.0x
	293.1x
	293.81
	293.82
	293.83
	293.84
	293.89
	293.9x
	294.0x
	294.10
	294.11
	294.20
	294.21
	294.8x
	294.9x
	295.00
	295.01
	295.02
	295.03
	295.04
	295.05
	295.10
	295.11
	295.12
	295.13
	295.14
	295.15
	295.20
	295.21
	295.22
	295.23
	295.24
	295.25
	295.30
	295.31
	295.32
	295.33
	295.34
	295.35
	295.40
	295.41
	295.42
	295.43
	295.44
	295.45
	295.50
	295.51
	295.52
	295.53
	295.54
	295.55
	295.60
	295.61
	295.62
	295.63
	295.64
	295.65
	295.70
	295.71
	295.72
	295.73
	295.74
	295.75
	295.80
	295.81
	295.82
	295.83
	295.84
	295.85
	295.90
	295.91
	295.92
	295.93
	295.94
	295.95
	296.00
	296.01
	296.02
	296.03
	296.04
	296.05
	296.06
	296.10
	296.11
	296.12
	296.13
	296.14
	296.15
	296.16
	296.20
	296.21
	296.22
	296.23
	296.24
	296.25
	296.26
	296.30
	296.31
	296.32
	296.33
	296.34
	296.35
	296.36
	296.40
	296.41
	296.42
	296.43
	296.44
	296.45
	296.46
	296.50
	296.51
	296.52
	296.53
	296.54
	296.55
	296.56
	296.60
	296.61
	296.62
	296.63
	296.64
	296.65
	296.66
	296.7
	296.80
	296.81
	296.82
	296.89
	296.90
	296.99
	297.0x
	297.1x
	297.2x
	297.3x
	297.8x
	297.9x
	298.0x
	298.1x
	298.2x
	298.3x
	298.4x
	298.8x
	298.9x
	299.00
	299.01
	299.10
	299.11
	299.80
	299.81
	299.90
	299.91
	300.00
	300.01
	300.02
	300.09
	300.10
	300.11
	300.12
	300.13
	300.14
	300.15
	300.16
	300.19
	300.20
	300.21
	300.22
	300.23
	300.29
	300.3x
	300.4x
	300.5x
	300.6x
	300.7x
	300.81
	300.82
	300.89
	300.9x
	301.0x
	301.10
	301.11
	301.12
	301.13
	301.20
	301.21
	301.22
	301.3x
	301.4x
	301.50
	301.51
	301.59
	301.6x
	301.7x
	301.81
	301.82
	301.83
	301.84
	301.89
	301.9x
	302.0x
	302.1x
	302.2x
	302.3x
	302.4x
	302.50
	302.51
	302.52
	302.53
	302.6x
	302.70
	302.71
	302.72
	302.73
	302.74
	302.75
	302.76
	302.79
	302.81
	302.82
	302.83
	302.84
	302.85
	302.89
	302.9x
	303.00
	303.01
	303.02
	303.03
	303.90
	303.91
	303.92
	303.93
	304.00
	304.01
	304.02
	304.03
	304.10
	304.11
	304.12
	304.13
	304.20
	304.21
	304.22
	304.23
	304.30
	304.31
	304.32
	304.33
	304.40
	304.41
	304.42
	304.43
	304.50
	304.51
	304.52
	304.53
	304.60
	304.61
	304.62
	304.63
	304.70
	304.71
	304.72
	304.73
	304.80
	304.81
	304.82
	304.83
	304.90
	304.91
	304.92
	304.93
	305.00
	305.01
	305.02
	305.03
	305.1x
	305.20
	305.21
	305.22
	305.23
	305.30
	305.31
	305.32
	305.33
	305.40
	305.41
	305.42
	305.43
	305.50
	305.51
	305.52
	305.53
	305.60
	305.61
	305.62
	305.63
	305.70
	305.71
	305.72
	305.73
	305.80
	305.81
	305.82
	305.83
	305.90
	305.91
	305.92
	305.93
	306.0x
	306.1x
	306.2x
	306.3x
	306.4x
	306.50
	306.51
	306.52
	306.53
	306.59
	306.6x
	306.7x
	306.8x
	306.9x
	307.0x
	307.1x
	307.20
	307.21
	307.22
	307.23
	307.3x
	307.40
	307.41
	307.42
	307.43
	307.44
	307.45
	307.46
	307.47
	307.48
	307.49
	307.50
	307.51
	307.52
	307.53
	307.54
	307.59
	307.6x
	307.7x
	307.80
	307.81
	307.89
	307.9x
	308.0x
	308.1x
	308.2x
	308.3x
	308.4x
	308.9x
	309.0x
	309.1x
	309.21
	309.22
	309.23
	309.24
	309.28
	309.29
	309.3x
	309.4x
	309.81
	309.82
	309.83
	309.89
	309.9x
	310.0x
	310.1x
	310.2x
	310.8x
	310.81
	310.89
	310.9x
	311.xx
	312.00
	312.01
	312.02
	312.03
	312.10
	312.11
	312.12
	312.13
	312.20
	312.21
	312.22
	312.23
	312.30
	312.31
	312.32
	312.33
	312.34
	312.35
	312.39
	312.4x
	312.81
	312.82
	312.89
	312.9x
	313.0x
	313.1x
	313.21
	313.22
	313.23
	313.3x
	313.81
	313.82
	313.83
	313.89
	313.9x
	314.00
	314.01
	314.1x
	314.2x
	314.8x
	314.9x
	315.00
	315.01
	315.02
	315.09
	315.1x
	315.2x
	315.31
	315.32
	315.34
	315.35
	315.39
	315.4x
	315.5x
	315.8x
	315.9x
	316.xx
	317.xx
	318.0x
	318.1x
	318.2x
	319.xx
	V11.0
	V11.1
	V11.2
	V11.3
	V11.8
	V11.9
Venous thromboembolism	415.11
	415.19
	451.11
	451.19
	451.2x
	453.40
	453.41
	453.42
	453.81
	453.82
	453.83
	453.84
	453.85
	453.86
	453.87
	453.89
	453.9x

## Sheet: Appendix 2
Table 2. HRU and Costs in the Baseline Period (Before PSM)
Demographic and Clinical Characteristics	Dabigatran (reference) N=70,608	Warfarin N=299,747			Dabigatran (reference) N=51,710	Rivaroxaban N=99,998			Dabigatran (reference) N=25,410	Apixaban N=45,543
	Mean ± SD or n(%)	Mean ± SD or n(%)	p-value	STD	Mean ± SD or n(%)	Mean ± SD or n(%)	p-value	STD	Mean ± SD or n(%)	Mean ± SD or n(%)	p-value	STD
All-cause healthcare resource utilization
Patients with ≥1 inpatient visit	37,985 (53.80%)	209,050 (69.74%)	<.0001	33.2628	28,380 (54.88%)	56,841 (56.84%)	<.0001	3.94623	13,052 (51.37%)	24,716 (54.27%)	<.0001	5.81959
Patients with ≥1 outpatient visit	70,172 (99.38%)	297,039 (99.10%)	<.0001	3.29187	51,598 (99.78%)	99,796 (99.80%)	0.5534	0.319213	25,345 (99.74%)	45,484 (99.87%)	0.0001	2.87937
Patients with ≥1 physician office visit	69,630 (98.61%)	293,740 (98.00%)	<.0001	4.7966	51,313 (99.23%)	99,352 (99.35%)	0.0065	1.45303	25,184 (99.11%)	45,324 (99.52%)	<.0001	4.95421
Patients with ≥1 outpatient hospital visit	57,127 (80.91%)	253,275 (84.50%)	<.0001	9.49953	43,999 (85.09%)	85,709 (85.71%)	0.0011	1.76358	21,607 (85.03%)	39,922 (87.66%)	<.0001	7.64855
Patients with ≥1 ER visit	21,734 (30.78%)	109,467 (36.52%)	<.0001	12.1672	17,804 (34.43%)	36,607 (36.61%)	<.0001	4.55063	8,885 (34.97%)	17,349 (38.09%)	<.0001	6.49767
Patients with ≥1 prescription	69,473 (98.39%)	292,229 (97.49%)	<.0001	6.34727	51,132 (98.88%)	98,960 (98.96%)	0.1515	0.772331	25,131 (98.90%)	45,218 (99.29%)	<.0001	4.05793
Number of visits per patient per month
Inpatient visits	0.07 ± 0.09	0.10 ± 0.11	<.0001	37.6957	0.07 ± 0.09	0.08 ± 0.10	<.0001	4.91889	0.07 ± 0.09	0.07 ± 0.09	<.0001	5.32621
Outpatient visits	1.67 ± 1.27	2.02 ± 1.57	<.0001	25.0249	1.95 ± 1.34	2.06 ± 1.39	<.0001	8.18173	1.96 ± 1.35	2.13 ± 1.39	<.0001	12.7738
Physician office visits	1.31 ± 1.10	1.52 ± 1.31	<.0001	17.7617	1.53 ± 1.16	1.62 ± 1.21	<.0001	8.14671	1.52 ± 1.16	1.65 ± 1.19	<.0001	11.598
Outpatient hospital visits PPPM	0.36 ± 0.45	0.50 ± 0.61	<.0001	26.6448	0.42 ± 0.50	0.44 ± 0.52	<.0001	2.9389	0.44 ± 0.53	0.48 ± 0.54	<.0001	7.15985
ER visits	0.04 ± 0.08	0.05 ± 0.11	<.0001	13.318	0.05 ± 0.09	0.05 ± 0.10	<.0001	4.02473	0.05 ± 0.14	0.05 ± 0.10	0.0004	2.91414
Prescriptions	1.78 ± 1.37	1.92 ± 1.51	<.0001	10.2554	2.10 ± 1.43	2.14 ± 1.48	<.0001	2.40534	2.12 ± 1.45	2.22 ± 1.47	<.0001	6.41916
Inpatient LOS	2.67 ± 4.71	5.53 ± 8.21	<.0001	42.6832	2.74 ± 4.78	3.09 ± 5.59	<.0001	6.71099	2.58 ± 4.62	2.86 ± 4.94	<.0001	5.86324
Cumulative LOS	3.83 ± 7.63	8.67 ± 13.99	<.0001	42.926	4.15 ± 8.32	4.80 ± 9.87	<.0001	7.07581	3.94 ± 8.21	4.35 ± 8.67	<.0001	4.90819
All-cause health care costs per patient per month
Inpatient costs	$711 ± $1,329	$1,573 ± $2,579	<.0001	42.0241	$765 ± $1,420	$866 ± $1,609	<.0001	6.66192	$723 ± $1,391	$796 ± $1,462	<.0001	5.1002
Outpatient costs	$463 ± $603	$550 ± $748	<.0001	12.7745	$534 ± $657	$568 ± $735	<.0001	4.88729	$527 ± $646	$587 ± $722	<.0001	8.75151
Physician office costs	$271 ± $417	$312 ± $538	<.0001	8.48701	$311 ± $459	$335 ± $535	<.0001	4.80536	$299 ± $438	$332 ± $500	<.0001	7.03155
Outpatient hospital costs	$192 ± $378	$238 ± $432	<.0001	11.3149	$223 ± $413	$233 ± $438	<.0001	2.37449	$228 ± $420	$255 ± $464	<.0001	6.08611
ER costs	$28 ± $42	$37 ± $54	<.0001	19.8036	$31 ± $46	$36 ± $54	<.0001	8.51424	$32 ± $55	$38 ± $56	<.0001	10.5254
Other costs	$217 ± $773	$551 ± $1,259	<.0001	32.0308	$251 ± $830	$293 ± $903	<.0001	4.90093	$250 ± $830	$255 ± $810	0.4844	0.549409
Pharmacy costs	$231 ± $389	$239 ± $478	<.0001	1.7876	$270 ± $431	$279 ± $560	0.0003	1.87716	$262 ± $445	$285 ± $593	<.0001	4.4506
Total medical (inpatient + outpatient + other) costs	$1,391 ± $1,969	$2,675 ± $3,495	<.0001	45.2447	$1,549 ± $2,124	$1,727 ± $2,387	<.0001	7.8654	$1,500 ± $2,102	$1,638 ± $2,173	<.0001	6.42009
Total (total medical + pharmacy) costs	$1,622 ± $2,057	$2,913 ± $3,574	<.0001	44.2849	$1,819 ± $2,217	$2,006 ± $2,507	<.0001	7.90669	$1,762 ± $2,194	$1,923 ± $2,306	<.0001	7.13529
ER: emergency room; LOS: length of stay; SD: standard deviation; STD: standardized difference

## Sheet: Online Table 3
Table 3. HRU and Costs During the Follow-up Period Among Newly-Diagnosed and Newly-Treated NVAF Patients after PSM
Outcomes	Dabigatran (reference) N=70,531			Warfarin N=70,531					Dabigatran (reference) N=51,673			Rivaroxaban N=51,673					Dabigatran (reference) N=25,209			Apixaban N=25,209
	N/Mean	%/SD	Median	N/Mean	%/SD	Median	p-value	STD	N/Mean	%/SD	Median	N/Mean	%/SD	Median	p-value	STD	N/Mean	%/SD	Median	N/Mean	%/SD	Median	p-value	STD
All-cause health care costs PPPM
Inpatient costs	1528.68	6504.16	0	1753.14	8475.55	0	<.0001	2.97124	1522.34	6722.59	0	1597.57	6811.04	0	0.0739794	1.1116	1422.38	5685.12	0	1267.64	5499.92	0	0.00189871	2.76637
Outpatient costs	889.385	1861.98	470.49	895.077	2550.51	519.05	0.632134	0.254925	884.905	1843.64	462.04	941.229	1681.56	500.54	<.0001	3.19212	874.819	2019.85	450.17	852.035	1593.12	450.9	0.159663	1.25254
Physician office costs	432.828	802.182	254.74	433.456	849.364	265.67	0.886486	0.0760169	421.984	778.584	245.44	444.196	865.673	263.1	<.0001	2.69796	402.486	699.527	233.57	386.199	639.122	235.56	0.00635234	2.43087
Outpatient hospital costs	456.557	1608.27	125.95	461.621	2349.27	175.21	0.636633	0.251563	462.921	1606.93	126.89	497.033	1360.66	147.95	0.00023095	2.29109	472.333	1861.02	127.4	465.836	1399	134.51	0.657705	0.394663
ER costs	63.5652	332.588	0	68.5646	302.456	0	0.00314232	1.57277	65.0151	349.735	0	77.1287	308.377	0	<.0001	3.67407	68.4924	348.036	0	64.219	243.955	0	0.110411	1.42191
Other costs	440.234	2456.55	0	565.419	3442.6	0	<.0001	4.18609	437.953	2087.33	0	451.293	2302.89	0	0.32926	0.60696	429.198	2063.63	0	396.038	1853.5	0	0.0576948	1.69062
Pharmacy costs	587.649	672.699	440.47	317.686	607.319	186.13	<.0001	42.1261	592.24	707.173	437.45	632.749	781.777	453.75	<.0001	5.43447	616.672	830.52	442.76	620.304	743.488	448.53	0.604997	0.460704
Total medical (inpatient + outpatient + other) costs	2858.3	7736.95	740.77	3213.64	9993.8	957.92	<.0001	3.97607	2845.2	7804.21	719.42	2990.09	7939.78	826.12	0.00309434	1.84044	2726.39	6947.81	694.6	2515.72	6513.54	684.6	0.000444644	3.12844
Total (total medical + pharmacy) costs	3445.95	7824.56	1334.19	3531.33	10045.2	1285.53	0.074964	0.948234	3437.44	7897.69	1318.46	3622.84	8048.23	1457.99	0.000186009	2.32518	3343.07	7084.43	1305.43	3136.02	6594.9	1320.16	0.000683453	3.02516
All-cause healthcare resource utilization
Patients with ≥1 inpatient visit	20343	0.288426		24331	0.344969		<.0001	12.1772	14460	0.279837		15636	0.302595		<.0001	5.01085	6832	0.271014		7146	0.28347		0.00178412	2.7828
Patients with ≥1 outpatient visit	69426	0.984333		69908	0.991167		<.0001	6.2156	50784	0.982796		50949	0.985989		<.0001	2.57631	24700	0.979809		24812	0.984252		0.000173452	3.34488
Patients with ≥1 physician office visit	68175	0.966596		68627	0.973005		<.0001	3.74533	49750	0.962785		50047	0.968533		<.0001	3.15664	24125	0.956999		24399	0.967869		<.0001	5.71849
Patients with ≥1 outpatient hospital visit	54395	0.771221		60225	0.85388		<.0001	21.2994	39581	0.76599		41138	0.796122		<.0001	7.29124	19289	0.765163		20326	0.806299		<.0001	10.0379
Patients with ≥1 ER visit	18504	0.262353		23665	0.335526		<.0001	16.0351	13619	0.263561		15495	0.299866		<.0001	8.0773	6757	0.268039		7533	0.298822		<.0001	6.83437
Number of visits per patient per month (PPPM)
Inpatient visits PPPM	0.121442	0.371412	0	0.131964	0.418012	0	<.0001	2.6612	0.12022	0.374084	0	0.130996	0.477567	0	5.40312e-05	2.51195	0.112546	0.3605	0	0.0993027	0.320615	0	<.0001	3.88215
Outpatient visits PPPM	2.88222	2.29228	2.34	4.23116	2.54633	3.75	<.0001	55.6809	2.86787	2.30528	2.31	2.97116	2.34787	2.42	<.0001	4.43946	2.81508	2.28069	2.3	2.69714	2.12691	2.21	<.0001	5.34802
Physician office visits PPPM	2.15445	1.80854	1.77	2.89351	2.11406	2.54	<.0001	37.5682	2.12946	1.81832	1.72	2.20724	1.83782	1.8	<.0001	4.25439	2.07313	1.80871	1.66	1.99824	1.67652	1.64	<.0001	4.29462
Outpatient hospital visits PPPM	0.727764	1.11449	0.41	1.33766	1.55496	0.9	<.0001	45.0847	0.73841	1.12563	0.41	0.763927	1.16541	0.41	0.000343792	2.22722	0.741944	1.14248	0.41	0.698905	1.01689	0.41	<.0001	3.97956
Outpatient ER visits PPPM	0.093761	0.413392	0	0.105806	0.411917	0	<.0001	2.91898	0.0964338	0.413337	0	0.109359	0.460206	0	<.0001	2.95503	0.100642	0.457778	0	0.0869152	0.334211	0	0.000120644	3.42491
Pharmacy visits PPPM	3.27348	1.96437	2.9	3.4248	2.07145	2.98	<.0001	7.49604	3.29197	2.008	2.9	3.30377	2.12657	2.9	0.358991	0.570678	3.28288	2.0922	2.9	3.20169	1.98585	2.87	<.0001	3.98039
Inpatient LOS PPPM	1.56892	4.06562	0	1.96787	4.74597	0	<.0001	9.02827	1.53718	4.08276	0	1.66884	4.57717	0	<.0001	3.03551	1.50588	4.12581	0	1.61477	4.42572	0	0.00427181	2.5452
Cumulative LOS PPPM	2.30221	6.32573	0	3.16657	7.91943	0	<.0001	12.0602	2.24541	6.273	0	2.45763	7.31508	0	<.0001	3.11446	2.1789	6.1812	0	2.46281	6.97769	0	<.0001	4.30717
